# Supplementary material for: Enhanced photocatalytic degradation of tetracycline by a H2O2-assisted Bi3NbO7/Bi2Sn2O7 composite under visible light
Source: Royal Society of Chemistry journal article supplement (doi:10.1039/d2cp05609g), 2023-01-01
Supplement: d2cp05609g1.pdf [file d2cp05609g1.pdf]

### Supporting information

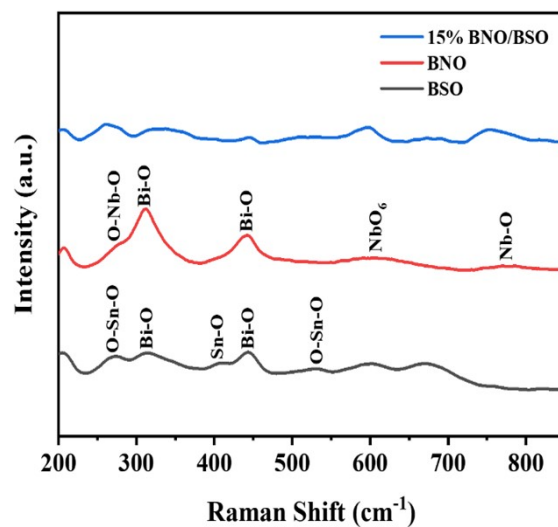

Fig.S1. Raman spectra of pure BNO, BSO and 15%BNO/BSO samples

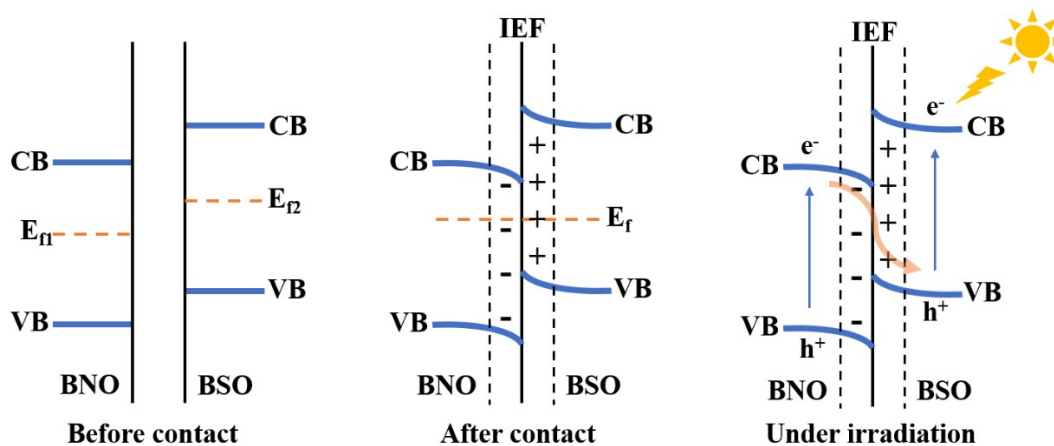

Fig.S2. Schematic diagram of charge transfer path at the BNO/BSO interface

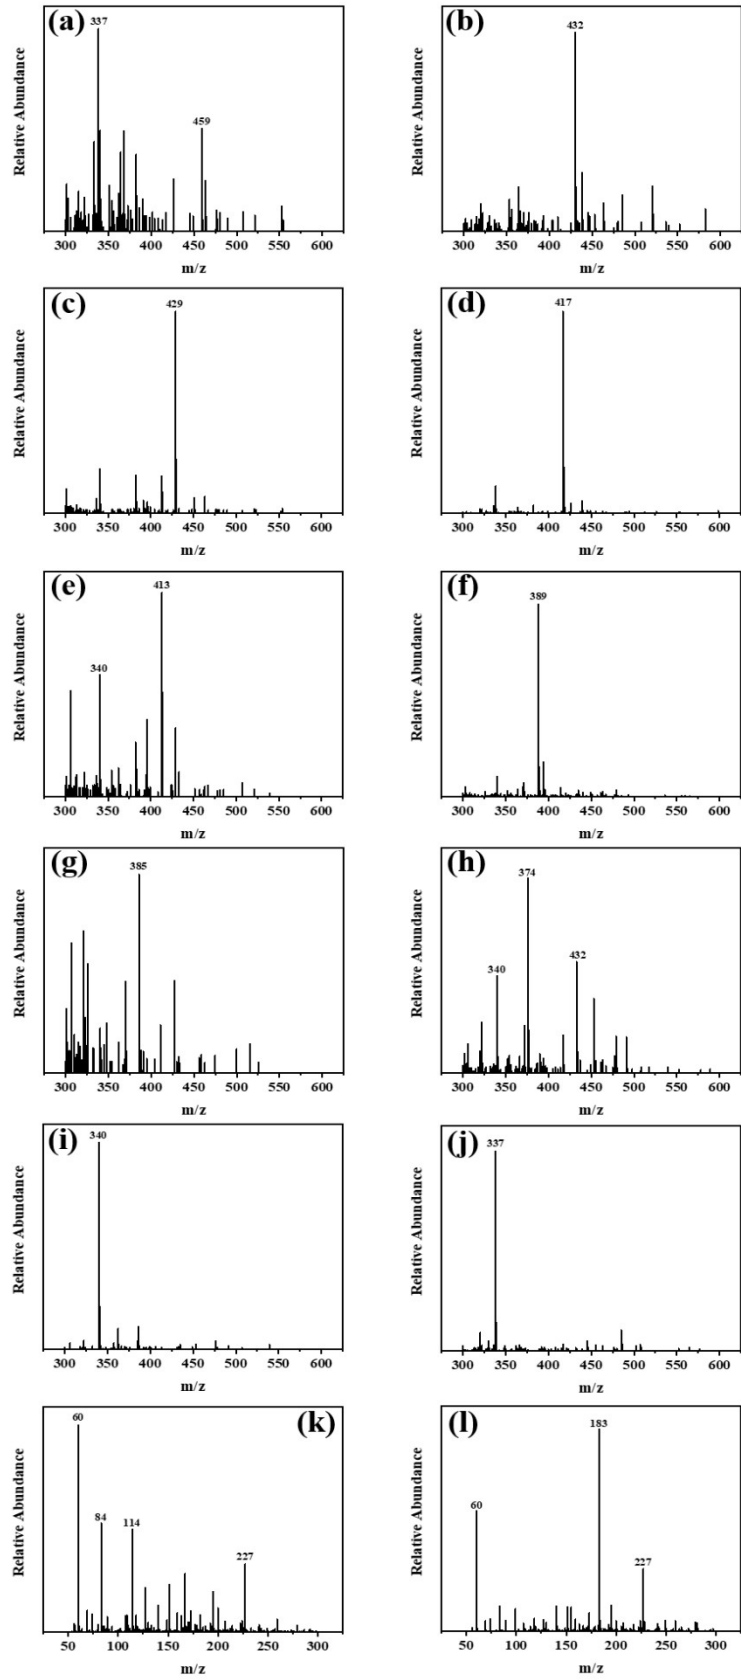

Fig.S3. Mass spectrum of the system when TC was degraded for 60min
